## 1 **Supplementary text**

### 2 **Sequencing statistics**

3 In total, 460,981 high-quality sequences were assigned to ITS2 and 1,054,333 to *rbcl*. There  
4 was considerable variation in the number of reads per sample, with the total number of high  
5 quality *rbcl* sequences varying from 3 to 56,981 and the number of ITS2 sequences ranging  
6 from 260 to 10,180 (excluding a single sample that contained zero sequences following  
7 quality control).

8

9 Excluding control samples, ITS2 reads included 179,450 grass sequences (Poaceae), assigned  
10 to 13 genera. Whilst not the focus of our study, the remaining 162,540 sequences consisted  
11 of 33 families and 31 genera of terrestrial plants. Of these families, 17 contained only a single  
12 genus and four contained reads which could not be identified confidently to genus level.  
13 Within the *rbcl* marker, 179,330 grass reads were assigned to 13 grass genera and the  
14 remaining 867,823 reads belonged to 68 families and 84 genera of terrestrial plants. Of these  
15 families, 33 contained only a single genus and 13 contained reads which could not be  
16 identified confidently to genus level.

17

### 18 **ITS2 and *rbcl* detect different grass species**

19 The contrasting characteristics of the ITS2 and *rbcl* markers makes them an ideal pairing. The  
20 ITS2 marker shows high specificity between species but cannot detect all plants [38], whereas  
21 *rbcl* primers are highly universal but the marker shows lower resolution between closely  
22 related plants [39].

23

24 Of the grass genera identified, only four were present in both ITS2 and *rbcl* datasets:  
25 *Dactylis*, *Lolium/Festuca*, *Anthoxanthum*, and *Avena*. While the proportion of reads assigned  
26 to *Lolium/Festuca* and *Anthoxanthum* were correlated between the two markers  
27 (*Lolium/Festuca* (*Lolium/Festuca*:  $t_{72}= 8.6$ , adjusted p-value < 0.001,  $r^2 = 0.5$ , S4A Fig;  
28 *Anthoxanthum*:  $t_{72}=2.9$ , adjusted p-value = 0.006,  $r^2 = 0.09$ , S4B Fig), this was not the case for  
29 *Dactylis* or *Avena* (S4C Fig; S4D Fig). However, both of the latter species were detected at

30 relatively low levels in both datasets, potentially increasing the degree of stochasticity  
31 introduced by library preparation [40].

32

### 33 **Positive and negative controls**

34 Negative controls, with all reagents and no DNA were used to identify any cross-  
35 contamination. Of the six negative controls, four contained no reads following quality control  
36 filtering, one contained a single read and one contained nine reads in the *rbcL* database.

37 None of the negative controls in the ITS2 dataset contained any reads.

38

39 Two positive control samples were also included, a grass positive control and an exotic plant  
40 positive control. Both sets of positive controls were diluted to 0.3 ng  $\mu\text{l}^{-1}$ , similar to that of  
41 the aerial eDNA samples.

42

43 The grass positive control contained a mixture of fifty-two species of grass from herbarium  
44 collections held at the National Botanic Garden of Wales. The mixture of grasses contained  
45 thirty-three genera, with twenty-four of these genera represented by a single species and the  
46 remaining nine genera represented by between two and five species (S1 Table). Of the  
47 thirty-three genera in the grass positive control sample, four were detected across both  
48 markers, eight were detected by the *rbcL* marker and twelve by the ITS2 marker. The  
49 remaining sequences were too similar to be identified to genus level (27% and 37% of reads  
50 in the grass positive control samples could not be reliably assigned to genus level, using ITS2  
51 and *rbcL* markers respectively). However, three of the genera not detected the positive  
52 control samples, despite being included, were detected in airborne samples (*Agrostis*,  
53 *Anthoxanthum*, *Alopecurus*), likely reflecting higher local abundances of airborne pollen (S2  
54 Table). The number of species in the grass positive control is much higher than the number of  
55 species predicted to contribute to airborne pollen concentrations according to phenological  
56 studies [41, 42]. Differences in taxon diversity between the grass positive control and the  
57 airborne samples will likely lead to differences in taxonomic assignment due to taxon-specific  
58 PCR amplification biases [43-45]. While sample coverage (i.e. number of reads) obtained for

59 the grass positive control samples was comparable to the airborne samples, the high diversity  
60 of the positive control and variation in the number of species between genera may have led  
61 to a higher likelihood of amplification for certain genera.

62

63 In order to check for cross-contamination between samples, an exotic plant positive control  
64 sample was used containing DNA extracted from twenty-one tropical tree species samples  
65 held at the National Botanic Garden of Wales. None of the genera identified in this positive  
66 control were present in the experimental samples.

67

68

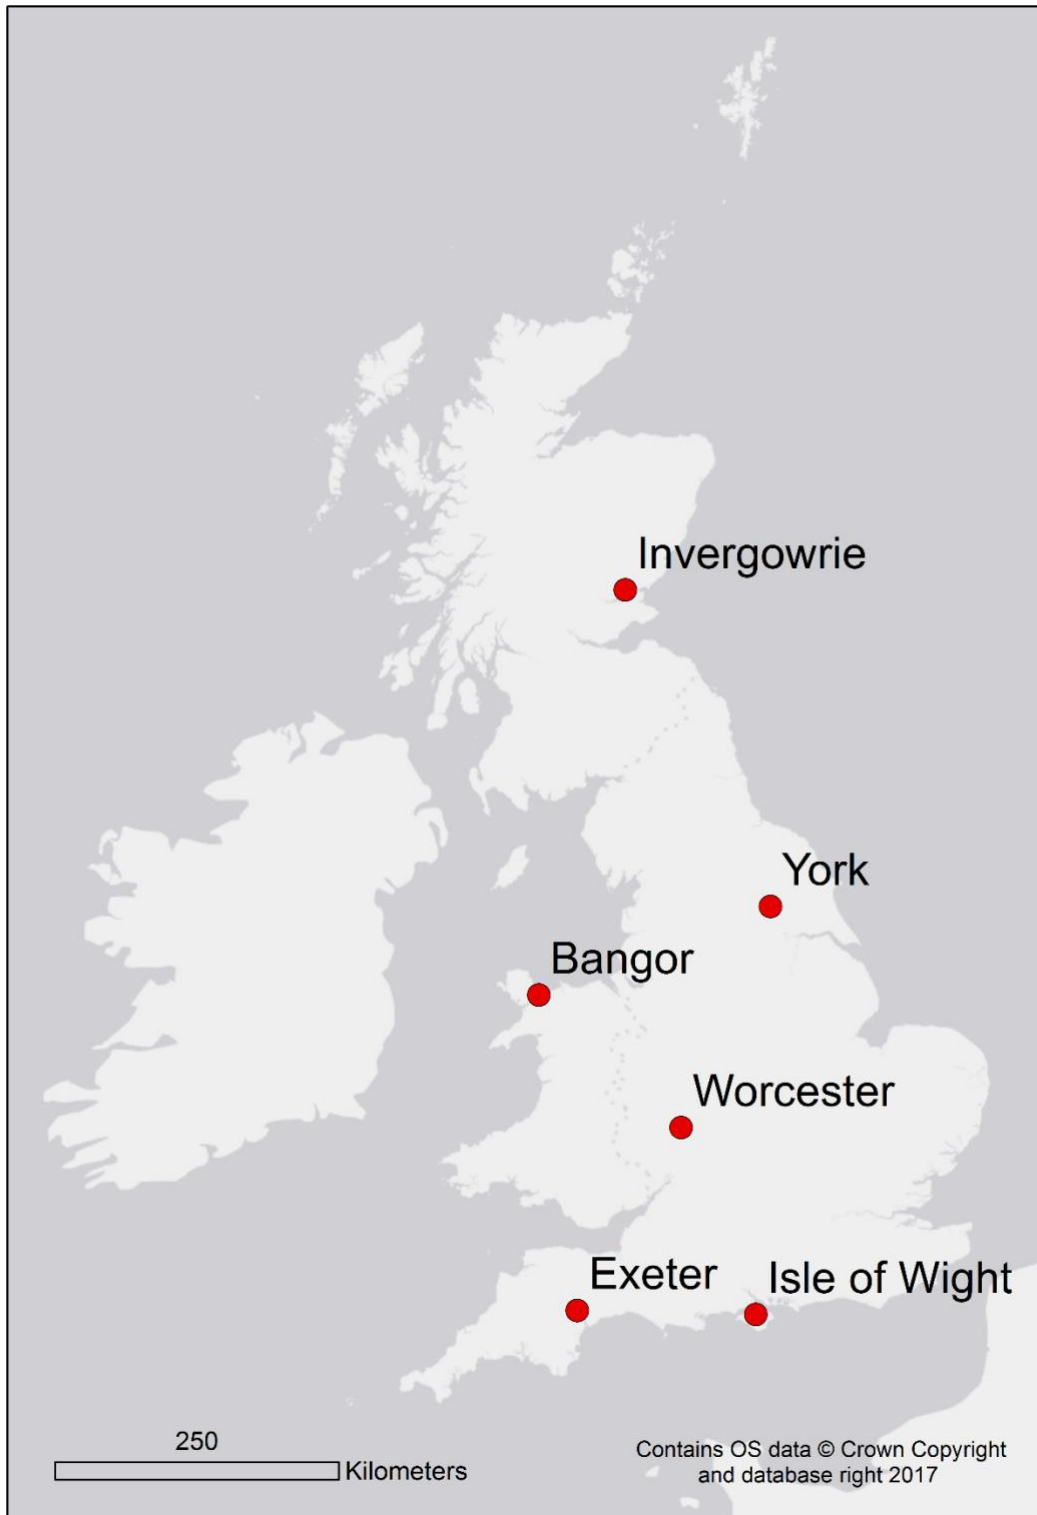

69

70 **S1 Fig.** Map showing position of the six sampling sites. Contains OS data Crown copyright and  
71 database right (2018). Image Crown Copyright, 2018, The Met Office.

72

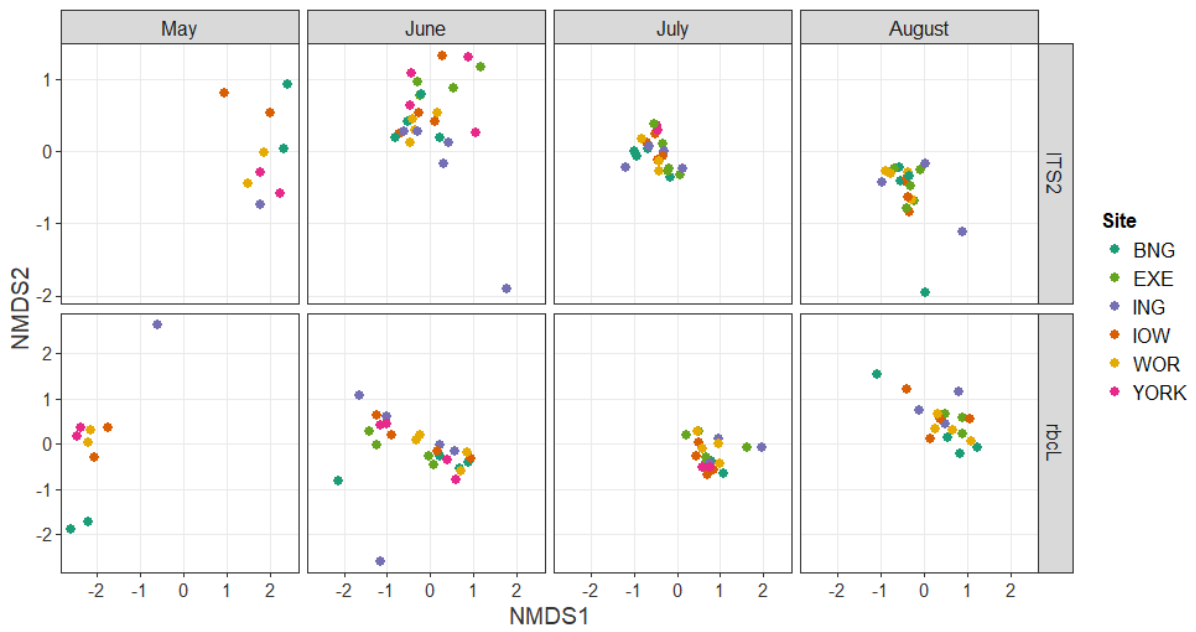

73

74 **S2 Fig.** Non-metric multidimensional scaling (NMDS) ordination of grass community similarity shows

75 a strong effect of time on the overall community composition. Coloured circles indicate sampling

76 sites. Site labels are abbreviated as follows: BNG = Bangor; EXE = Exeter; ING = Invergowrie; IOW =

77 Isle of Wight; WOR = Worcester; YORK = York. Coloured circles indicate samples sites. Site labels

78 abbreviated as follows: BNG = Bangor; EXE = Exeter; ING = Invergowrie; IOW = Isle of Wight; WOR =

79 Worcester; YORK = York.

80

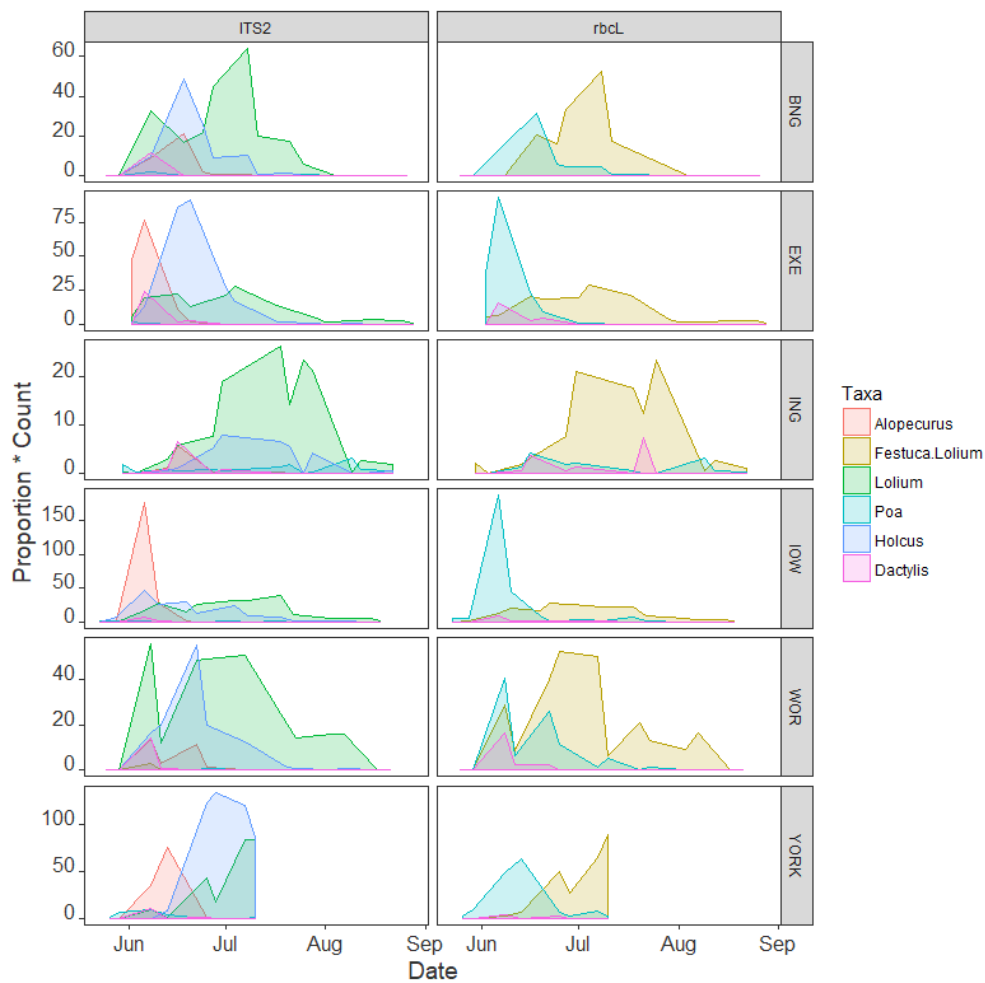

81

82 **S3 Fig.** Relative abundance of the five most abundant grasses at genus level, normalized according to  
 83 airborne pollen concentration data. Relative abundances were calculated as a proportion of reads  
 84 assigned to Poaceae, rather than of reads as a whole, then multiplied by mean pollen concentration  
 85 across the three pooled days. Markers used to identify grass pollen are stated in the top panel label.  
 86 Due to errors in sampling equipment, only 4 weeks of samples were collected at the York sampling  
 87 site. Sampling sites are indicated in the right panel label abbreviated as follows: BNG = Bangor; EXE =  
 88 Exeter; ING = Invergowrie; IOW = Isle of Wight; WOR = Worcester; YORK = York.

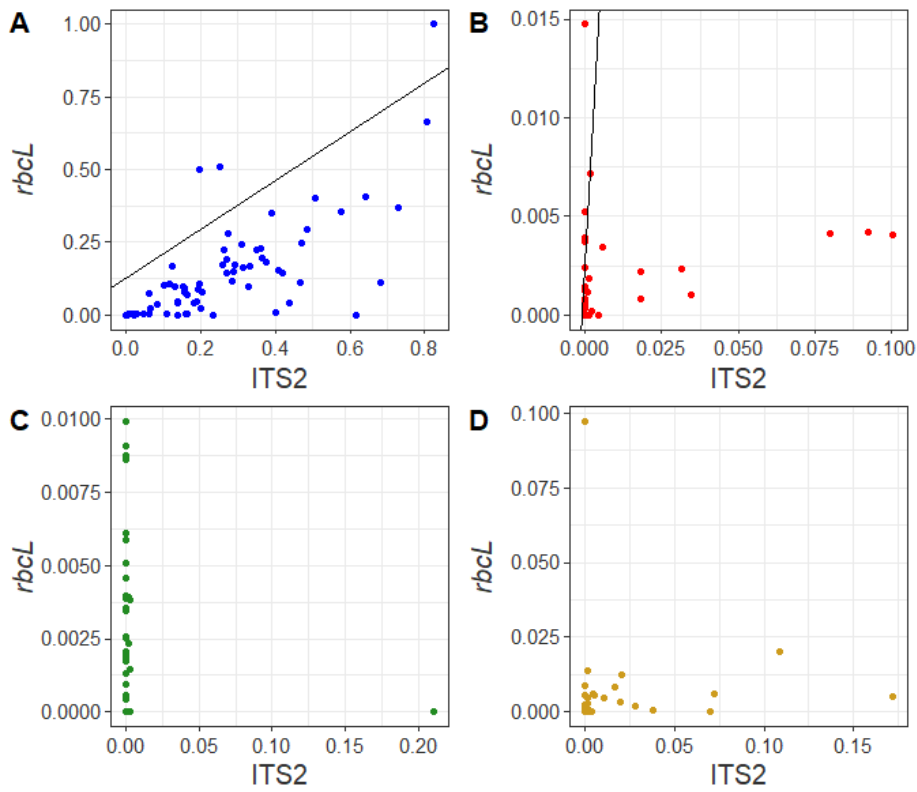

89

90 **S4 Fig.** Correlations between proportions of reads made up by the same genus in the two marker  
 91 gene datasets. All four genera present in both datasets are shown: (A) *Lolium/Festuca*, (B)  
 92 *Anthoxanthum*, (C) *Avena*, and (D) *Dactylis*. For cases where there was a significant relationship  
 93 between relative abundances in both datasets, black lines show the intercept and slope.

94

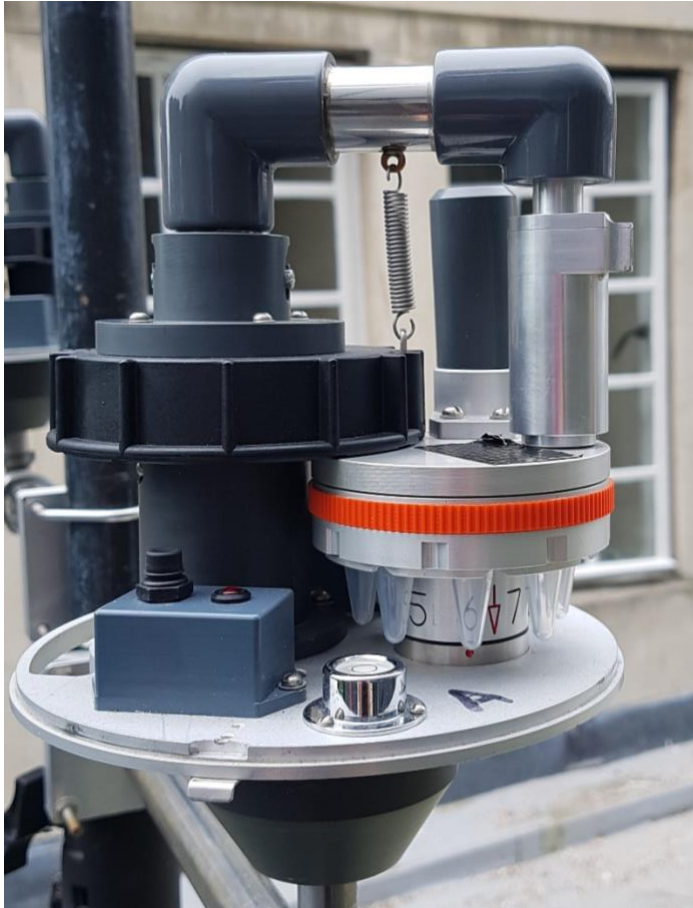

95

96

97 **S5 Fig.** Photograph of 1.5 ml microcentrifuge tubes mounted onto carousel on Burkard Automatic  
98 Multi-Vial Cyclone Sampler. Author provided.

99

100



101 A)

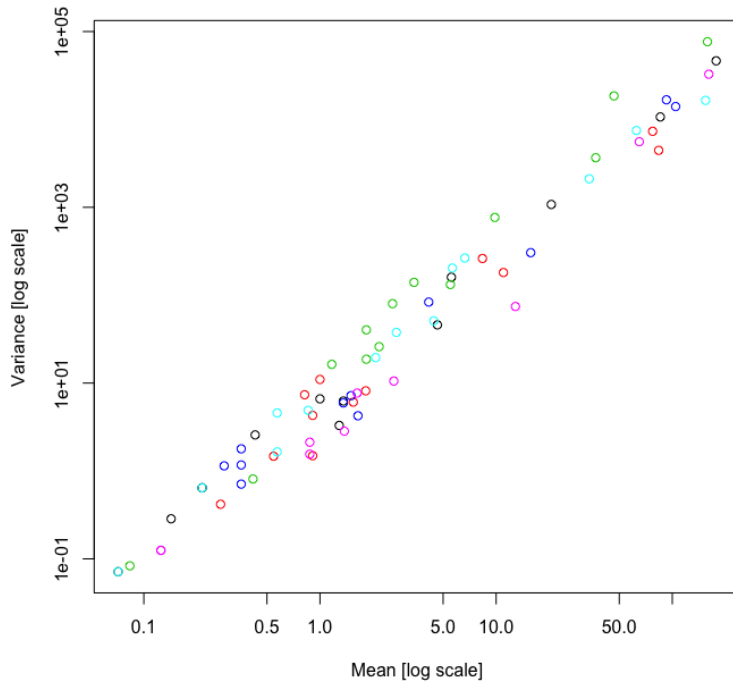

102

103 B)

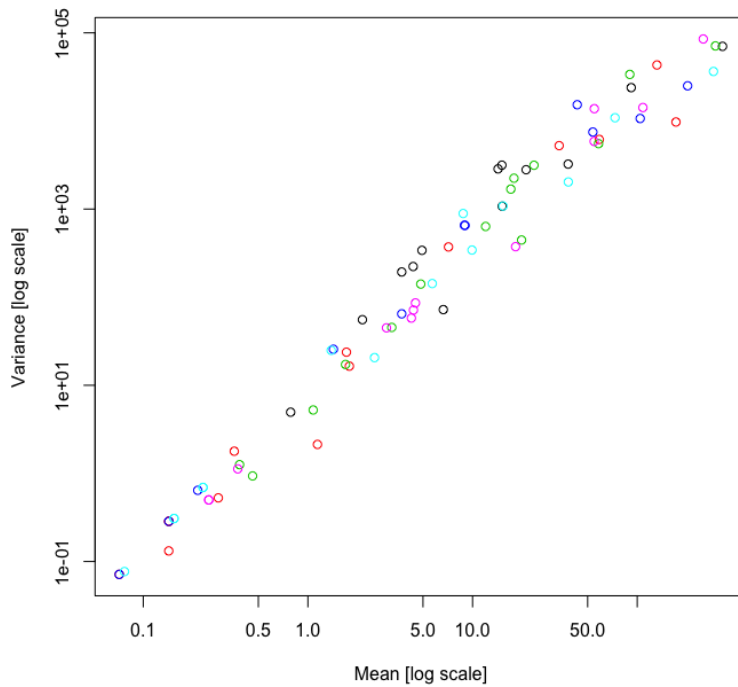

104

105

106 **S6 Fig.** There is a strong relationship between the mean proportion of sequences and the variance of  
107 the proportion of sequences from each sampling site using both A) *rbcL* and B) ITS2 markers.

108 Coloured circles denote sampling site. The plots were produced using the `meanvar.plot` function in  
109 the `mvabund` package in R (21).

110 A)

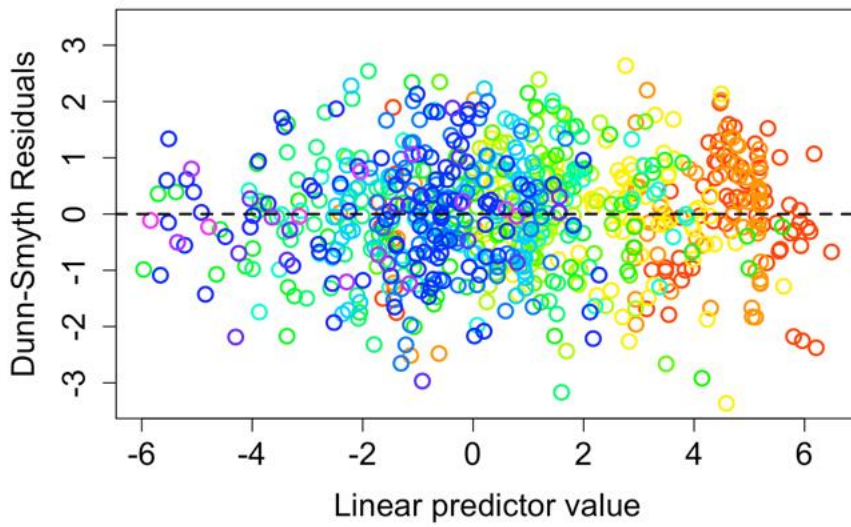

111

112 B)

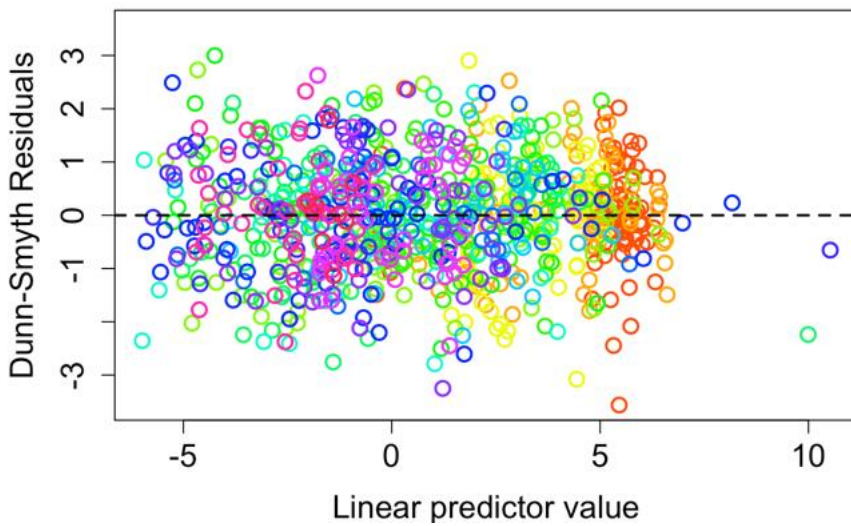

113

114 **S7 Fig.** Scatter plot of linear predictor values and the residuals output from the models selected to  
115 analyse the abundance data produced by the A) *rbcl* marker and B) ITS2 marker. Little pattern  
116 suggests that the models selected are plausible and the mean-variance assumption of the negative  
117 binomial regression is correct. Coloured circles denote different genera in the abundance data. The  
118 plots were produced using the `plot.manyglm` function in the `mvabund` package in R (21).

119

120

121

122 **S1 List** Borneo plant taxa pooled for the exotic plant positive control.

123

124 *Aglaia sp.*

125 *Antidesma sp.*

126 *Baccaurea stipulata*

127 *Cynometra sp.*

128 *Dalbergia sp.*

129 *Dehaasia sp.*

130 *Dillenia excelsa*

131 *Diospyros sp.*

132 *Kleinhovia hospita*

133 *Lagerstroemia sp.*

134 *Lophopyxis sp.*

135 *Madhuca dubardii*

136 *Mallotus muticus*

137 *Microcos crassifolia*

138 *Pternandra sp.*

139 *Pterospermum macrocarpum*

140 *Syzygium sp.*

141 *Uncaria sp.*

142 *Urophyllum sp.*

143 *Vatica sp.*

144 *Xylosma sp.*

145

**S1 Table.** Grass species pooled for the Grass Positive Control at equal volumes.

| <b>Grass positive control</b>  | <b>Concentration of DNA<br/>(ng/<math>\mu</math>l)</b> |
|--------------------------------|--------------------------------------------------------|
| <i>Agrostis canina</i>         | 0.121                                                  |
| <i>Agrostis capillaris</i>     | 1.29                                                   |
| <i>Agrostis gigantea</i>       | 9.48                                                   |
| <i>Agrostis stolonifera</i>    | 3.7                                                    |
| <i>Agrostis vinealis</i>       | 1.03                                                   |
| <i>Aira praecox</i>            | 0.8                                                    |
| <i>Alopecurus geniculatus</i>  | 1.18                                                   |
| <i>Alopecurus pratensis</i>    | 1.42                                                   |
| <i>Anisantha sterilis</i>      | 0.848                                                  |
| <i>Anthoxanthum odoratum</i>   | 0.804                                                  |
| <i>Arrhenatherum elatius</i>   | 1.36                                                   |
| <i>Brachypodium sylvaticum</i> | 0.804                                                  |
| <i>Briza media</i>             | 2                                                      |
| <i>Bromopsis ramosa</i>        | 0.35                                                   |
| <i>Bromus hordeaceus</i>       | 0.098                                                  |
| <i>Catapodium rigidum</i>      | 3.96                                                   |
| <i>Cynosurus cristatus</i>     | 0.0736                                                 |
| <i>Dactylis glomerata</i>      | 13.8                                                   |
| <i>Danthonia decumbens</i>     | 1.34                                                   |
| <i>Deschampsia cespitosa</i>   | 2.52                                                   |
| <i>Deschampsia flexuosa</i>    | 0.648                                                  |
| <i>Elymus caninus</i>          | 1.62                                                   |
| <i>Elytrigia repens</i>        | 3.47                                                   |
| <i>Festuca arundinacea</i>     | 1.21                                                   |
| <i>Festuca gigantea</i>        | 1.32                                                   |
| <i>Festuca ovina</i>           | 0.592                                                  |
| <i>Festuca pratensis</i>       | 1.34                                                   |
| <i>Festuca rubra</i>           | 2.68                                                   |
| <i>Glyceria declinata</i>      | 0.226                                                  |
| <i>Glyceria fluitans</i>       | 0.892                                                  |
| <i>Glyceria maxima</i>         | 8.32                                                   |
| <i>Glyceria notata</i>         | 0.992                                                  |
| <i>Holcus lanatus</i>          | 0.42                                                   |
| <i>Holcus mollis</i>           | below detection limit*                                 |
| <i>Hordeum murinum</i>         | 0.476                                                  |
| <i>Hordeum secalinum</i>       | 0.416                                                  |
| <i>Lolium perenne</i>          | 0.452                                                  |
| <i>Milium effusum</i>          | 0.524                                                  |
| <i>Molinia caerulea</i>        | 2.24                                                   |
| <i>Nardus stricta</i>          | 0.246                                                  |
| <i>Phalaris arundinacea</i>    | below detection limit*                                 |

|                             |                        |
|-----------------------------|------------------------|
| <i>Phleum bertolonii</i>    | 0.444                  |
| <i>Phleum pratense</i>      | 18                     |
| <i>Phragmites australis</i> | 13.2                   |
| <i>Poa annua</i>            | 0.0844                 |
| <i>Poa humilis</i>          | 2.37                   |
| <i>Poa pratensis</i>        | 1.13                   |
| <i>Poa trivialis</i>        | below detection limit* |
| <i>Puccinellia distans</i>  | 11.1                   |
| <i>Trisetum flavescens</i>  | 0.736                  |
| <i>Triticum aestivum</i>    | 1.47                   |
| <i>Vulpia myuros</i>        | 0.199                  |

147

148 \* note these samples successfully amplified using *rbcL* and ITS2 primers shown in S5 Table.

149 **S2 Table.** Genera included in the grass positive control, and genera detected using metabarcoding of  
 150 both marker genes in both the positive control and in actual aerial DNA extracts. Genera with a grey  
 151 background were detected by at least one marker gene; genera with a white background were not.

| Expected             | rbcl- Control         | ITS2- Control         | rbcl- Samples         | ITS2- Samples         |
|----------------------|-----------------------|-----------------------|-----------------------|-----------------------|
| <i>Agrostis</i>      |                       |                       |                       | <i>Agrostis</i>       |
| <i>Aira</i>          |                       |                       |                       |                       |
| <i>Alopecurus</i>    |                       |                       |                       | <i>Alopecurus</i>     |
| <i>Anisantha</i>     |                       |                       |                       |                       |
| <i>Anthoxanthum</i>  |                       |                       | <i>Anthoxanthum</i>   | <i>Anthoxanthum</i>   |
| <i>Arrhenatherum</i> |                       | <i>Arrhenatherum</i>  |                       | <i>Arrhenatherum</i>  |
| <i>Avena</i>         | <i>Avena</i>          |                       | <i>Avena</i>          | <i>Avena</i>          |
| <i>Brachypodium</i>  |                       |                       |                       |                       |
| <i>Briza</i>         | <i>Briza</i>          | <i>Briza/Bromus</i>   | <i>Briza</i>          |                       |
| <i>Bromopsis</i>     |                       |                       |                       |                       |
| <i>Bromus</i>        |                       | <i>Briza/Bromus</i>   |                       |                       |
| <i>Catapodium</i>    |                       |                       |                       |                       |
| <i>Cynosurus</i>     |                       | <i>Cynosurus</i>      |                       | <i>Cynosurus</i>      |
| <i>Dactylis</i>      | <i>Dactylis</i>       | <i>Dactylis</i>       | <i>Dactylis</i>       |                       |
| <i>Danthonia</i>     |                       |                       |                       |                       |
| <i>Deschampsia</i>   |                       | <i>Deschampsia</i>    |                       | <i>Deschampsia</i>    |
| <i>Elymus</i>        |                       |                       |                       |                       |
| <i>Elytrigia</i>     |                       |                       |                       |                       |
| <i>Festuca</i>       | <i>Festuca/Lolium</i> | <i>Festuca/Lolium</i> | <i>Festuca/Lolium</i> | <i>Festuca/Lolium</i> |
| <i>Glyceria</i>      |                       | <i>Glyceria</i>       |                       |                       |
| <i>Holcus</i>        |                       |                       |                       | <i>Holcus</i>         |
| <i>Hordeum</i>       |                       | <i>Hordeum</i>        |                       | <i>Hordeum</i>        |
| <i>Lolium</i>        |                       | <i>Lolium</i>         |                       | <i>Lolium</i>         |
| <i>Milium</i>        |                       |                       |                       |                       |
| <i>Molinia</i>       | <i>Molinia</i>        |                       | <i>Molinia</i>        |                       |
| <i>Nardus</i>        |                       |                       |                       |                       |
| <i>Phalaris</i>      |                       |                       |                       |                       |
| <i>Phleum</i>        | <i>Phleum</i>         |                       | <i>Phleum</i>         |                       |
| <i>Phragmites</i>    |                       |                       |                       |                       |
| <i>Poa</i>           | <i>Poa</i>            | <i>Poa</i>            | <i>Poa</i>            | <i>Poa</i>            |
| <i>Puccinellia</i>   |                       |                       |                       |                       |
| <i>Trisetum</i>      |                       |                       |                       |                       |
| <i>Triticum</i>      | <i>Poa</i>            |                       |                       |                       |
| <i>Vulpia</i>        |                       |                       |                       |                       |

152

153

154 **S3 Table.** Latitude and longitude of each pollen sampling site.

| Site Name      | Abbreviation | Latitude | Longitude |
|----------------|--------------|----------|-----------|
| Bangor         | BNG          | 53.2300  | -4.1300   |
| Exeter         | EXE          | 50.7365  | -3.5322   |
| Invergowrie    | ING          | 56.4576  | -3.0687   |
| Isle of Wight  | IOW          | 50.7111  | -1.3009   |
| Worcestershire | WORK         | 52.1976  | -2.2430   |
| York           | YORK         | 53.9484  | -1.0535   |

155

156 **S4 Table.** Sample collection dates of each sequenced air sample. Three consecutive days of air  
 157 samples were pooled during DNA extraction (note that sample ING\_w2\_p2, three consecutive  
 158 samples were unavailable due to sampling error and the next sampling day was selected for pooling).  
 159 The mean pollen concentration for the three pooled days and the index i5 and i7 sequence for  
 160 demultiplexing is shown here.

| Sample    | Index i5 and i7 Sequence | Week | Pool | Site | Collection date (2016)    | Mean pollen conc. (grains m <sup>-3</sup> ) |
|-----------|--------------------------|------|------|------|---------------------------|---------------------------------------------|
| BNG_w1_p1 | CAAGTCGT                 | 1    | 1    | BNG  | 25 May - 28 May           | 61.7                                        |
| BNG_w1_p2 | TAACGTCG                 | 1    | 2    | BNG  | 29 May - 01 Jun           | 27                                          |
| BNG_w2_p1 | CTGTATGC                 | 2    | 1    | BNG  | 08 Jun - 11 Jun           | NA                                          |
| BNG_w2_p2 | TGCTTGCT                 | 2    | 2    | BNG  | 18 Jun - 21 Jun           | NA                                          |
| BNG_w3_p1 | GTAGTACC                 | 3    | 1    | BNG  | 24 Jun - 27 Jun           | NA                                          |
| BNG_w3_p2 | AAGTCCTC                 | 3    | 2    | BNG  | 27 Jun - 30 Jun           | NA                                          |
| BNG_w4_p1 | GCATAACG                 | 4    | 1    | BNG  | 08 Jul - 11 Jul           | 35.3                                        |
| BNG_w4_p2 | ATAGTCGG                 | 4    | 2    | BNG  | 11 Jul - 14 Jul           | 18.3                                        |
| BNG_w5_p1 | TAGGAGCT                 | 5    | 1    | BNG  | 21 Jul - 24 Jul           | 5.7                                         |
| BNG_w5_p2 | AGGTGTTG                 | 5    | 2    | BNG  | 25 Jul - 28 Jul           | 2                                           |
| BNG_w6_p1 | CATTGACG                 | 6    | 1    | BNG  | 04 Aug - 07 Aug           | 4.3                                         |
| BNG_w6_p2 | CCACAACA                 | 6    | 2    | BNG  | 08 Aug - 11 Aug           | 1.3                                         |
| BNG_w7_p1 | TCTAGGAG                 | 7    | 1    | BNG  | 22 Aug - 25 Aug           | 3.3                                         |
| BNG_w7_p2 | TTGCTTGG                 | 7    | 2    | BNG  | 26 Aug - 29 Aug           | 2.3                                         |
| EXE_w1_p1 | TGATCACG                 | 1    | 1    | EXE  | 02 Jun - 05 Jun           | 63                                          |
| EXE_w1_p2 | TCTGGACA                 | 1    | 2    | EXE  | 06 Jun - 09 Jun           | 139.3                                       |
| EXE_w2_p1 | CAGTGCTT                 | 2    | 1    | EXE  | 16 Jun - 19 Jun           | 126                                         |
| EXE_w2_p2 | ATAGTCC                  | 2    | 2    | EXE  | 20 Jun - 23 Jun           | 124.7                                       |
| EXE_w3_p1 | CTGTACCA                 | 3    | 1    | EXE  | 01 Jul - 04 Jul           | 52.3                                        |
| EXE_w3_p2 | AAGCATCG                 | 3    | 2    | EXE  | 04 Jul - 07 Jul           | 61.3                                        |
| EXE_w4_p1 | CCTGTCAA                 | 4    | 1    | EXE  | 14 Jul - 17 Jul           | 56                                          |
| EXE_w4_p2 | AATGGTCG                 | 4    | 2    | EXE  | 17 Jul - 20 Jul           | 21.7                                        |
| EXE_w5_p1 | CTCCTGAA                 | 5    | 1    | EXE  | 29 Jul - 01 Aug           | 7                                           |
| EXE_w5_p2 | GACGAACT                 | 5    | 2    | EXE  | 01 Aug - 04 Aug           | 2.7                                         |
| EXE_w6_p1 | GGTCGTAT                 | 6    | 1    | EXE  | 11 Aug - 14 Aug           | 2.3                                         |
| EXE_w6_p2 | AAGTGCAG                 | 6    | 2    | EXE  | 14 Aug - 17 Aug           | 3.3                                         |
| EXE_w7_p1 | CCATGAAC                 | 7    | 1    | EXE  | 25 Aug - 28 Aug           | 3                                           |
| EXE_w7_p2 | TACTAGCG                 | 7    | 2    | EXE  | 28 Aug - 31 Aug           | 0.7                                         |
| ING_w1_p1 | GTGATCCA                 | 1    | 1    | ING  | 30 May - 02 Jun           | 2                                           |
| ING_w1_p2 | ATAACGCC                 | 1    | 2    | ING  | 03 Jun - 06 Jun           | 1                                           |
| ING_w2_p1 | ACCATAGG                 | 2    | 1    | ING  | 13 Jun - 16 Jun           | 7                                           |
| ING_w2_p2 | AGTTCGCA                 | 2    | 2    | ING  | 16 Jun, 19 Jun,<br>20 Jun | 19.3                                        |
| ING_w3_p1 | CAACTTGG                 | 3    | 1    | ING  | 27 Jun - 30 Jun           | 19                                          |



|            |           |   |   |      |                 |       |
|------------|-----------|---|---|------|-----------------|-------|
| ING_w3_p2  | CGCAATGT  | 3 | 2 | ING  | 30 Jun - 03 Jul | 38    |
| ING_w4_p1  | GGCTCAAT  | 4 | 1 | ING  | 18 Jul - 21 Jul | 67.7  |
| ING_w4_p2  | GACTTG TG | 4 | 2 | ING  | 21 Jul - 24 Jul | 22.7  |
| ING_w5_p1  | GCTACAAC  | 5 | 1 | ING  | 25 Jul - 28 Jul | 19.7  |
| ING_w5_p2  | GGTACGAA  | 5 | 2 | ING  | 28 Jul - 31 Jul | 27.3  |
| ING_w6_p1  | ACGAACGA  | 6 | 1 | ING  | 09 Aug - 12 Aug | 3.3   |
| ING_w6_p2  | AACACTGG  | 6 | 2 | ING  | 12 Aug - 15 Aug | 3.3   |
| ING_w7_p1  | TGGATGGT  | 7 | 1 | ING  | 22 Aug - 25 Aug | 3     |
| IOW_w1_p1  | TACTGCTC  | 1 | 1 | IOW  | 23 May - 26 May | 7.3   |
| IOW_w1_p2  | CTTCGCAA  | 1 | 2 | IOW  | 28 May - 31 May | 13.7  |
| IOW_w2_p1  | GATCAAGG  | 2 | 1 | IOW  | 06 Jun - 09 Jun | 253   |
| IOW_w2_p2  | GGCGAATA  | 2 | 2 | IOW  | 10 Jun - 13 Jun | 84    |
| IOW_w3_p1  | CAACGAGT  | 3 | 1 | IOW  | 19 Jun - 22 Jun | 57.7  |
| IOW_w3_p2  | ATCGGAGA  | 3 | 2 | IOW  | 22 Jun - 25 Jun | 39.7  |
| IOW_w4_p1  | TGTTCCGT  | 4 | 1 | IOW  | 04 Jul - 07 Jul | 86    |
| IOW_w4_p2  | ATCCACGA  | 4 | 2 | IOW  | 08 Jul - 11 Jul | 52.3  |
| IOW_w5_p1  | TCACCTAG  | 5 | 1 | IOW  | 18 Jul - 21 Jul | 64.3  |
| IOW_w5_p2  | AGGATAGC  | 5 | 2 | IOW  | 22 Jul - 25 Jul | 13    |
| IOW_w6_p1  | ATGACAGG  | 6 | 1 | IOW  | 03 Aug - 06 Aug | 5     |
| IOW_w6_p2  | CCGTTATG  | 6 | 2 | IOW  | 06 Aug - 09 Aug | 6.7   |
| IOW_w7_p1  | ACCTCTTC  | 7 | 1 | IOW  | 15 Aug - 18 Aug | 4.3   |
| IOW_w7_p2  | ACAGAGGT  | 7 | 2 | IOW  | 18 Aug - 21 Aug | 2     |
| WOR_w1_p1  | CGCTACAT  | 1 | 1 | WOR  | 25 May - 28 May | 0     |
| WOR_w1_p2  | AACCAGAG  | 1 | 2 | WOR  | 29 May - 01 Jun | 0     |
| WOR_w2_p1  | GCAATTCC  | 2 | 1 | WOR  | 08 Jun - 11 Jun | 114.7 |
| WOR_w2_p2  | AGCCGTAA  | 2 | 2 | WOR  | 11 Jun - 14 Jun | 40.7  |
| WOR_w3_p1  | AACAAGGC  | 3 | 1 | WOR  | 22 Jun - 25 Jun | 131   |
| WOR_w3_p2  | GAGCAATC  | 3 | 2 | WOR  | 25 Jun - 28 Jun | 78.7  |
| WOR_w4_p1  | AGTATGCC  | 4 | 1 | WOR  | 07 Jul - 10 Jul | 76    |
| WOR_w4_p2  | TCGATGAC  | 4 | 2 | WOR  | 10 Jul - 13 Jul | 16    |
| WOR_w5_p1  | GATACCTG  | 5 | 1 | WOR  | 20 Jul - 23 Jul | 26.3  |
| WOR_w5_p2  | ACCGACAA  | 5 | 2 | WOR  | 23 Jul - 26 Jul | 16    |
| WOR_w6_p1  | ACGAATCC  | 6 | 1 | WOR  | 03 Aug - 06 Aug | 0     |
| WOR_w6_p2  | TCGAGAGT  | 6 | 2 | WOR  | 07 Aug - 10 Aug | 0     |
| WOR_w7_p1  | GTTCTTCG  | 7 | 1 | WOR  | 17 Aug - 20 Aug | 0     |
| WOR_w7_p2  | CCTTCCAT  | 7 | 2 | WOR  | 21 Aug - 24 Aug | 0     |
| YORK_w1_p1 | TCCACGTT  | 1 | 1 | YORK | 26 May - 29 May | 3     |
| YORK_w1_p2 | TTACCGAC  | 1 | 2 | YORK | 29 May - 01 Jun | 9.7   |
| YORK_w2_p1 | TTCGCCAT  | 2 | 1 | YORK | 08 Jun - 11 Jun | 84.7  |
| YORK_w2_p2 | TATGGCAC  | 2 | 2 | YORK | 13 Jun - 16 Jun | 96.7  |
| YORK_w3_p1 | CGCGTATT  | 3 | 1 | YORK | 25 Jun - 28 Jun | 178   |
| YORK_w3_p2 | AGCCTATC  | 3 | 2 | YORK | 28 Jun - 01 Jul | 157   |
| YORK_w4_p1 | GACACAGT  | 4 | 1 | YORK | 07 Jul - 10 Jul | 234.3 |

|                         |          |   |   |      |                 |       |
|-------------------------|----------|---|---|------|-----------------|-------|
| YORK_w4_p2              | GAGAGTAC | 4 | 2 | YORK | 10 Jul - 13 Jul | 245.3 |
| Negative control 1      | CCACTAAG | - | - | -    | -               | -     |
| Negative control 2      | CCACATTG | - | - | -    | -               | -     |
| Negative control 3      | CCGATGTA | - | - | -    | -               | -     |
| Negative control 4      | CTCGGTAA | - | - | -    | -               | -     |
| Negative control 5      | AACCGTGT | - | - | -    | -               | -     |
| Negative control 6      | CGGTTGTT | - | - | -    | -               | -     |
| Negative control 7      | CTAGCAGT | - | - | -    | -               | -     |
| Negative control 8      | ACAACAGC | - | - | -    | -               | -     |
| Negative control 9      | GATTGTCC | - | - | -    | -               | -     |
| Exotic positive control | ACAGGCAT | - | - | -    | -               | -     |
| Grass positive control  | TTCGTACG | - | - | -    | -               | -     |

161

162 **S5 Table.** Primer sequences used in library preparation. Round 1 PCR primer sequences contain  
 163 forward or reverse template primer, the forward primer sequence contains a series of N's in order to  
 164 improve clustering and cluster detection on MiSeq sequencing. Round 1 and round 2 sequences  
 165 contain complementary universal tails. Round 2 PRC primers sequences also contain the P5 or P7  
 166 Illumina adaptors and an 8 bp unique index on both the forward and reverse primers used for  
 167 demultiplexing samples (see S4 Table for index i5 and i7 sequence).

| <b>Round 1 PCR</b>                                                                                                                                              |
|-----------------------------------------------------------------------------------------------------------------------------------------------------------------|
| Forward Universal Tail - NNNNNN - Template Specific Primer <b><i>rbclLaF</i></b><br><br>[ACACTCTTCCCTACACGACGCTCTCCGATCT]-[NNNNNN]-[ATGTCACCACAAACAGAGACTAAAGC] |
| Reverse Universal Tail - Template Specific Primer <b><i>rbclr506</i></b><br><br>[GTGACTGGAGTTCAGACGTGTGCTCTCCGATCT]-[AGGGGACGACCATACTTGTTCA]                    |
| Forward Universal Tail - NNNNNN - Template Specific Primer <b><i>ITS2F</i></b><br><br>[ACACTCTTCCCTACACGACGCTCTCCGATCT]-[NNNNNN]-[ATGCGATACTTGGTGTGAAT]         |
| Reverse Universal Tail - Template Specific Primer <b><i>ITS3R</i></b><br><br>[GTGACTGGAGTTCAGACGTGTGCTCTCCGATCT]- [GACGCTTCTCCAGACTACAAT]                       |
| <b>Round 2 PCR</b>                                                                                                                                              |
| P5 Illumina adapter - <b>i5 index</b> - Forward Universal Tail<br><br>[AATGATACGGCGACCACCGAGATCTACAC]-[ <b>i5 index</b> ]-[ACACTCTTCCCTACACGACGCTC]             |
| P7 Illumina adapter - <b>i7 index</b> - Reverse Universal Tail<br><br>[CAAGCAGAAGACGGCATAACGAGAT]-[ <b>i7 index</b> ]-[GTGACTGGAGTTCAGACGTGTGCTC]               |

168

169 **S6 Table.** Model selection based on AIC criteria. Models shown in bold were used to analyse the data  
 170 presented here.

| Marker      | Model                                                                                | AIC      |
|-------------|--------------------------------------------------------------------------------------|----------|
| <i>rbCL</i> | <b>(1) Time + Time:Latitude + Latitude + Longitude + Month</b>                       | 3444.949 |
| <i>rbCL</i> | (2) Time + Time:Latitude + Latitude + Month                                          | 3462.208 |
| <i>rbCL</i> | (3) Time + Time:Latitude + Time:Longitude + Latitude + Longitude + Month             | 3467.373 |
| <i>rbCL</i> | (4) Latitude + Month + Longitude +                                                   | 3473.788 |
| <i>rbCL</i> | (5) Latitude + Month                                                                 | 3474.854 |
| <i>rbCL</i> | (6) Time + Time:Longitude + Longitude                                                | 3479.546 |
| <i>rbCL</i> | (7) Time + Time:Latitude + Time:Longitude + Latitude + Longitude +<br>Month500_urban | 3486.374 |
| <i>rbCL</i> | (8) Latitude:Month + Longitude + Month                                               | 3489.559 |
| <i>rbCL</i> | (9) Time + Site_ID + Time:Latitude + Month                                           | 3504.327 |
| <i>rbCL</i> | (10) Time                                                                            | 3582.784 |
| <i>rbCL</i> | (11) Time + Site_ID + Time:Site_ID + Month                                           | 3584.097 |
| <i>rbCL</i> | (12) Time + Time:Latitude                                                            | 3584.776 |
| <i>rbCL</i> | (13) Time + Longitude +                                                              | 3586.391 |
| <i>rbCL</i> | (14) Time + Time:Latitude + Time:Longitude + Latitude + Longitude                    | 3590.813 |
| <i>rbCL</i> | (15) Time + Time:Longitude + Longitude                                               | 3611.398 |
| <i>rbCL</i> | (16) Latitude                                                                        | 3614.176 |
| <i>rbCL</i> | (17) Time + Site_ID + Time:Site_ID + Latitude + Month                                | 3615.487 |
| <i>rbCL</i> | (18) Time + Site_ID                                                                  | 3655.547 |
| <i>rbCL</i> | (19) Site_ID                                                                         | 3688.586 |
| <i>rbCL</i> | (20) Time + Site_ID + Time:Site ID                                                   | 3719.946 |
| <i>rbCL</i> | (21) Time + Site_ID + Time:Site_ID + Latitude                                        | 3751.946 |

|      |                                                                                          |          |
|------|------------------------------------------------------------------------------------------|----------|
| ITS2 | (22) Time + Time:Latitude + Time:Longitude + Latitude + Longitude + Month                | 4306.795 |
| ITS2 | (23) Time + Time:Latitude + Latitude + Longitude + Month                                 | 4312.207 |
| ITS2 | (24) Time + Time:Latitude + Time:Longitude + Latitude + Longitude + Month<br>+ 500_urban | 4314.299 |
| ITS2 | (25) Time + Time:Latitude + Latitude + Month                                             | 4328.732 |
| ITS2 | (26) Latitude:Month + Longitude + Month                                                  | 4345.029 |
| ITS2 | (27) Latitude + Month + Longitude                                                        | 4345.197 |
| ITS2 | (28) Latitude + Month                                                                    | 4353.331 |
| ITS2 | (29) Time + Site_ID + Time:Latitude + Month                                              | 4362.502 |
| ITS2 | (30) Time + Site_ID + Time:Site_ID + Month                                               | 4363.541 |
| ITS2 | (31) Time + Time:Longitude + Longitude + Month                                           | 4377.7   |
| ITS2 | (32) Time + Site_ID + Time:Site_ID + Latitude + Month                                    | 4392.966 |
| ITS2 | (33) Time + Time:Latitude + Time:Longitude + Latitude + Longitude                        | 4550.79  |
| ITS2 | (34) Time + Time:Latitude + Latitude                                                     | 4569.352 |
| ITS2 | (35) Time + Time:Longitude + Longitude                                                   | 4603.281 |
| ITS2 | (36) Time + Longitude                                                                    | 4604.212 |
| ITS2 | (37) Time                                                                                | 4610.119 |
| ITS2 | (38) Time + Site_ID                                                                      | 4625.929 |
| ITS2 | (39) Time + Site_ID + Time:Site ID                                                       | 4650.117 |
| ITS2 | (40) Latitude                                                                            | 4675.797 |
| ITS2 | (41) Time + Site_ID + Time:Site_ID + Latitude                                            | 4680.117 |
| ITS2 | (42) Site_ID                                                                             | 4747.236 |

171

172

173

174 **References**

175

- 176 38 Cheng T, Xu C, Lei L, Li C, Zhang Y, Zhou S. Barcoding the kingdom Plantae: new PCR  
177 primers for ITS regions of plants with improved universality and specificity. *Mol Ecol*  
178 *Resour.* 2015; 16: 138-149.
- 179 39 Hollingsworth ML, Clark AA, Forrest LL, Richardson J, Pennington TR, Long DG, et al.  
180 Selecting barcoding loci for plants: evaluation of seven candidate loci with species-  
181 level sampling in three divergent groups of land plants. *Mol Ecol Resour.* 2009; 9: 439-  
182 457.
- 183 40 Alberdi A, Aizpurua O, Gilbert MTP, Bohmann K. Scrutinizing key steps for reliable  
184 metabarcoding of environmental samples. *Methods Ecol Evol.* 2018; 9: 134-147.
- 185 41 Ghitarrini S, Galán C, Frenguelli G, Tedeschini E. Phenological analysis of grasses  
186 (Poaceae) as a support for the dissection of their pollen season in Perugia (Central  
187 Italy). *Aerobiologia.* 2017; 33: 339-349.
- 188 42 Romero-Morte J, Rojo J, Rivero R, Fernández-González F, Pérez-Badia R. Standardised  
189 index for measuring atmospheric grass-pollen emission. *Science Total Environ.* 2018;  
190 612: 180-191.
- 191 43 Bista I, Carvalho GR, Tang M, Walsh K, Zho X, Hajibabaei M, et al. Performance of  
192 amplicon and shotgun sequencing for accurate biomass estimation in invertebrate  
193 community samples. *Mol Ecol Resour.* 2018; 18: 1020-1034.
- 194 44 Pawluczyk M, Weiss J, Links MG, Aranguren ME, Wikinson MD, Egea-Cortines M.  
195 Quantitative evaluation of bias in PCR amplification and next-generation sequencing  
196 derived from metabarcoding samples. *Anal and Bioanal Chem.* 2015; 407: 1841-1848.
- 197 45 Suzuki M, Giovannoni S. Bias caused by template annealing in the amplification of  
198 mixtures of 16S rRNA genes by PCR. *Appl Environ Microbiol.* 1996; 62: 625-630.  
199  
200
